# Supplementary material for: Vitamin K antagonist anticoagulant usage is associated with increased incidence and progression of osteoarthritis
Source: PubMed Central journal article supplement (PMC8053344; doi:10.1136/annrheumdis-2020-219483), 2021-03-03
Supplement: annrheumdis-2020-219483supp001.pdf [file annrheumdis-2020-219483supp001.pdf]

## Supplementary Figures

Boer C.G et al., *Vitamin K antagonist anticoagulant usage is associated with increased incidence and progression of osteoarthritis*

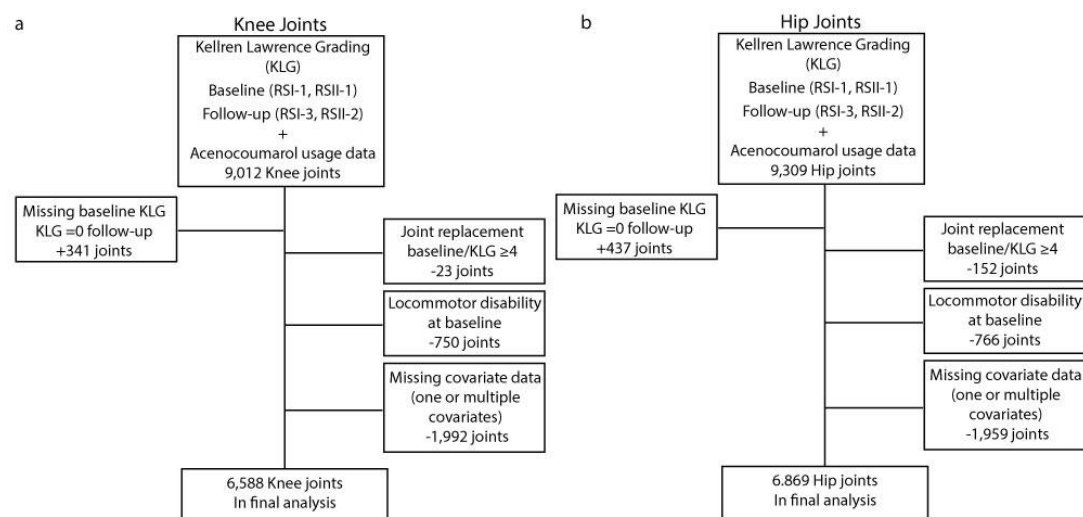

**Online Supplementary Figure S1: Flow-chart of included knee and hip joints of the Rotterdam Study** a) Flow-chart for the number of knee joints included in the analysis from the Rotterdam study. b) Flow-chart for the number of hip joints included in the analysis from the Rotterdam study. RS: Rotterdam Study, RSI: Rotterdam study subcohort I, RSII: Rotterdam Study subcohort II, KLG: Kellgren-Lawrence Grading.
