# Supplementary material for: Vitamin K antagonist anticoagulant usage is associated with increased incidence and progression of osteoarthritis
Source: PubMed Central journal article supplement (PMC8053344; doi:10.1136/annrheumdis-2020-219483), 2021-03-03
Supplement: annrheumdis-2020-219483supp003.pdf [file annrheumdis-2020-219483supp003.pdf]

**Supplement Tables for:**

Boer C.G et al., *Vitamin K antagonist anticoagulant usage is associated with increased incidence and progression of osteoarthritis*

| <b>Supplementary Table S1. Distribution of VKORC1 H-Haplotypes in the Rotterdam Study Cohorts</b> |                     |                                          |                                |                      |
|---------------------------------------------------------------------------------------------------|---------------------|------------------------------------------|--------------------------------|----------------------|
| VKORC1 Haplotype                                                                                  | Haplotype Sequence* | RS-I (n = 12,582) <sup>†</sup>           | RS-II (n = 4,314) <sup>†</sup> | Total Frequency      |
| <i>Haplotype distribution</i>                                                                     |                     | <i>Proportion (number of haplotypes)</i> |                                |                      |
| H1                                                                                                | GGCTAGAGAC          | 0.13 (1,655)                             | 0.14 (597)                     | 0.13                 |
| H2                                                                                                | GGCTCGAGAC          | 0.24 (3,012)                             | 0.23 (980)                     | 0.24                 |
| H3                                                                                                | GGCCAGGGGC          | <0.01 (66)                               | <0.01 (17)                     | 4.9*10 <sup>-3</sup> |
| H4                                                                                                | GGCCAGGCAC          | <0.01 (8)                                | <0.01 (5)                      | 7.1*10 <sup>-4</sup> |
| H5                                                                                                | AGCTCGAGAC          | 0.02 (221)                               | 0.02 (66)                      | 0.02                 |
| H6                                                                                                | AGCCAGGCGC          | <0.01 (8)                                | <0.01 (2)                      | 5.9*10 <sup>-4</sup> |
| H7                                                                                                | AGCCAGGCGT          | 0.26 (3,238)                             | 0.25 (1,097)                   | 0.26                 |
| H8                                                                                                | ATCCAGGCGT          | 0.12 (1,498)                             | 0.11 (490)                     | 0.12                 |
| H9                                                                                                | ATGCAAGCGC          | 0.22 (2,818)                             | 0.24 (1,022)                   | 0.23                 |
| H10 <sup>‡</sup>                                                                                  | GGGCAAGCGC          | <0.01 (47)                               | <0.01 (22)                     | 4.1*10 <sup>-3</sup> |
| Other Haplotypes <sup>§</sup>                                                                     | -                   | <0.01 (11)                               | <0.01 (17)                     | 1.7*10 <sup>-3</sup> |
| <i>Group distribution</i>                                                                         |                     |                                          |                                |                      |
| (Low VKORC1) Group A                                                                              | H1, H2              | 0.37 (4,667)                             | 0.37 (1,577)                   | 0.37                 |
| (High VKORC1) Group B                                                                             | H7, H8, H9          | 0.60 (7,554)                             | 0.60 (2,609)                   | 0.60                 |

\* for each haplotype the ten investigated single nucleotide variants (SNVs) are listed in sequential order along the *VKORC1* gene, alleles are coded to the plus-strand, and match the haplotypes reported on PHARMGKB: rs7196161, rs17880887, rs17881535, rs9923231, rs2884737, rs17708472, rs9934438, rs8050894, s2359612 and rs7294.

<sup>†</sup> Haplotypes have been calculated on all individuals of whom genotype information was available, not only individuals included in our acenocoumarol study population. The total number of haplotypes is twice the number of individuals examined.

<sup>‡</sup> The H10 *VKORC1* haplotype has not been described previously[1].

<sup>§</sup> Other haplotypes consist of another 16 haplotypes, occurring on average only once in either RS-I or RS-II.

RS: Rotterdam Study, *VKORC1*: Vitamin K Epoxide Reductase Complex 1, H: haplotype

| Supplementary Table S2. Association between acenocoumarol use and risk of OA incidence and progression in RSI and RSII |                                    |                              |      |           |                       |                                            |                              |      |           |                       |                                           |                              |      |            |         |
|------------------------------------------------------------------------------------------------------------------------|------------------------------------|------------------------------|------|-----------|-----------------------|--------------------------------------------|------------------------------|------|-----------|-----------------------|-------------------------------------------|------------------------------|------|------------|---------|
|                                                                                                                        | Overall Osteoarthritis Progression |                              |      |           |                       | Overall progression of Knee Osteoarthritis |                              |      |           |                       | Overall progression of Hip Osteoarthritis |                              |      |            |         |
|                                                                                                                        | Joints N*                          | Incidence/ Progression N (%) | OR   | 95% CI    | p-value               | Joints N*                                  | Incidence/ Progression N (%) | OR   | 95% CI    | p-value               | Joints N*                                 | Incidence/ Progression N (%) | OR   | 95% CI     | p-value |
| <b>Non-users</b>                                                                                                       | 12,594                             | 506 (4.0%)                   | 1    | -         | -                     | 6,162                                      | 329 (5.3%)                   | 1    | -         | -                     | 6,432                                     | 177 (2.8%)                   | 1    | -          | -       |
| <b>Users</b>                                                                                                           | 863                                | 94 (10.9%)                   | 2.92 | 2.32-3.68 | < 0.001               | 426                                        | 55 (12.9%)                   | 2.62 | 1.94-3.56 | < 0.001               | 437                                       | 39 (8.9%)                    | 3.46 | 2.14-4.97  | < 0.001 |
| <b>Duration of Acenocoumarol usage</b>                                                                                 |                                    |                              |      |           |                       |                                            |                              |      |           |                       |                                           |                              |      |            |         |
| <b>Non users</b>                                                                                                       | 12,594                             | 506 (4.0%)                   | 1    | -         | -                     | 6,162                                      | 329 (5.3%)                   | 1    | -         | -                     | 6,432                                     | 177 (2.8%)                   | 1    | -          | -       |
| <b>≤ 180 days</b>                                                                                                      | 279                                | 35 (12.5%)                   | 3.43 | 2.38-4.94 | < 0.001               | 144                                        | 15 (10.4%)                   | 2.06 | 1.19-3.56 | 9.4*10 <sup>-03</sup> | 135                                       | 20 (14.8%)                   | 6.14 | 3.73-10.11 | < 0.001 |
| <b>&gt;180 days &amp; ≤ 556 days</b>                                                                                   | 285                                | 36 (12.6%)                   | 3.45 | 2.41-4.95 | < 0.001               | 135                                        | 20 (14.8%)                   | 3.08 | 1.89-5.02 | < 0.001               | 150                                       | 16 (10.7%)                   | 4.21 | 2.46-7.24  | < 0.001 |
| <b>&gt;556 days</b>                                                                                                    | 299                                | 23 (7.7%)                    | 1.99 | 1.29-3.07 | 1.9*10 <sup>-03</sup> | 147                                        | 20 (13.6%)                   | 2.79 | 1.72-4.53 | < 0.001               | 152                                       | 3 (2.0%)                     | 0.71 | 0.22-2.25  | 0.56    |

Incidence and progression of osteoarthritis(OA) in RS-I and RS-II within the follow-up time associated with acenocoumarol use. Model used is a GEE (Generalized Estimated Equations) multivariate logistic regression model including acenocoumarol use.

Acenocoumarol usage examined by tertiles: first ≤ 180 days, second >180 days and ≤ 556 days, third: >556 days of acenocoumarol use

\*Number of individual knee and/or hip joints studied from RSI and RSII (Supplementary Figure S1 for exclusions)

| Supplementary Table S3. Association between acenocoumarol use and risk of overall OA progression in RSI and RSII separately |                                                  |                   |         |             |                       |                                                   |                   |         |              |                       |
|-----------------------------------------------------------------------------------------------------------------------------|--------------------------------------------------|-------------------|---------|-------------|-----------------------|---------------------------------------------------|-------------------|---------|--------------|-----------------------|
| Acenocoumarol usage                                                                                                         | RS-I: Overall progression of Osteoarthritis      |                   |         |             |                       | RS-II: Overall progression of Osteoarthritis      |                   |         |              |                       |
|                                                                                                                             | Joints N*                                        | Progression N (%) | OR adj. | 95% CI      | p-value               | Joints N*                                         | Progression N (%) | OR adj. | 95% CI       | p-value               |
| <i>Non-users</i>                                                                                                            | 9,178                                            | 406 (4.4%)        | 1       | -           | -                     | 3,416                                             | 100 (2.9%)        | 1       | -            | -                     |
| <i>Users</i>                                                                                                                | 745                                              | 79(10.6%)         | 2.39    | 1.82 - 3.13 | < 0.001               | 118                                               | 15 (12.7%)        | 3.68    | 1.91 - 7.07  | < 0.001               |
| ≤ 180 days                                                                                                                  | 244                                              | 31 (12.7%)        | 2.73    | 1.79 - 4.18 | < 0.001               | 35                                                | 4 (11.4%)         | 4.13    | 1.35 - 12.59 | 1.3x10 <sup>-02</sup> |
| >180 days & ≤ 556 days                                                                                                      | 237                                              | 29 (12.2%)        | 2.70    | 1.77 - 4.12 | < 0.001               | 48                                                | 7 (14.6%)         | 5.61    | 2.21 - 14.25 | < 0.001               |
| >556 days                                                                                                                   | 245                                              | 19 (7.2%)         | 1.75    | 1.05 - 2.89 | 3.1x10 <sup>-02</sup> | 35                                                | 4 (11.4%)         | 1.59    | 0.50 - 5.00  | 0.43                  |
|                                                                                                                             | RS-I: Overall progression of Knee Osteoarthritis |                   |         |             |                       | RS-II: Overall progression of Knee Osteoarthritis |                   |         |              |                       |
| <i>Non-users</i>                                                                                                            | 4,455                                            | 256 (5.7%)        | 1       | -           | -                     | 1,707                                             | 73 (4.6%)         | 1       | -            | -                     |
| <i>Users</i>                                                                                                                | 370                                              | 47 (12.7%)        | 2.32    | 1.64 - 3.30 | < 0.001               | 56                                                | 8 (14.3%)         | 2.61    | 1.10 - 6.16  | < 0.001               |
| ≤ 180 days                                                                                                                  | 127                                              | 13 (10.2%)        | 1.67    | 0.94 - 3.13 | 9.8x10 <sup>-02</sup> | 17                                                | 2 (11.7%)         | 2.89    | 0.59 - 14.12 | 0.19                  |
| >180 days & ≤ 556 days                                                                                                      | 113                                              | 18 (15.9%)        | 2.90    | 1.70 - 1.95 | < 0.001               | 22                                                | 2 (7.4%)          | 2.01    | 0.41 - 9.86  | 0.39                  |
| >556 days                                                                                                                   | 130                                              | 16 (12.3%)        | 2.57    | 1.43 - 4.62 | 1.6x10 <sup>-03</sup> | 17                                                | 4 (23.5%)         | 2.85    | 0.81 - 9.97  | 0.11                  |
|                                                                                                                             | RS-I: Overall progression of Hip Osteoarthritis  |                   |         |             |                       | RS-II: Overall progression of Hip Osteoarthritis  |                   |         |              |                       |
| <i>Non-users</i>                                                                                                            | 4,723                                            | 150 (3.2%)        | 1       | -           | -                     | 1709                                              | 27 (1.6%)         | 1       | -            | -                     |
| <i>Users</i>                                                                                                                | 375                                              | 32 (8.5%)         | 2.52    | 1.62 - 3.92 | < 0.001               | 62                                                | 7 (11.3%)         | 6.52    | 2.31 - 18.39 | < 0.001               |
| ≤ 180 days                                                                                                                  | 117                                              | 18 (15.4%)        | 4.69    | 2.52 - 8.69 | < 0.001               | 18                                                | 2 (11.1%)         | 7.89    | 1.83 - 33.89 | 5.5x10 <sup>-03</sup> |
| >180 days & ≤ 556 days                                                                                                      | 124                                              | 11 (8.9%)         | 2.72    | 1.32 - 5.57 | 6.3x10 <sup>-03</sup> | 26                                                | 5 (19.2%)         | 1.49    | 3.68 - 60.4  | < 0.001               |
| >556 days                                                                                                                   | 134                                              | 3 (2.2%)          | 0.65    | 0.20 - 2.13 | 0.48                  | 18                                                | 0 (0.0%)          | -       | -            | -                     |

Overall progression of Osteoarthritis(OA) in RS-I and RS-II within the follow-up time associated with acenocoumarol use. Model used is a GEE (Generalized Estimated Equations) multivariate logistic regression model including acenocoumarol use and adjusted for age, sex, BMI, smoking, time between baseline and follow-up visit, baseline OA severity in Kellgren-Lawrence score, joint modeled, femoral neck BMD, HDL/total cholesterol ratio, physical activity, education level, hypertension and diabetes mellites.

Acenocoumarol usage examined by tertiles: first ≤ 180 days, second >180 days and ≤ 556 days, third: >556 days of acenocoumarol use

OR: odds ratio, CI: confidence interval, Progression: number of joints showing overall progression of either hip or knee joints or both.

\*Number of individual knee and/or hip joints studied from RS-I and RS-II.

| Supplementary Table S4 : Acenocoumarol usage with OA incidence or OA progression |         |                           |      |           |      |           |                       |
|----------------------------------------------------------------------------------|---------|---------------------------|------|-----------|------|-----------|-----------------------|
| Acenocoumarol usage                                                              | Joints† | Incidence/<br>Progression | OR   | 95% CI    | OR   | 95% CI    | P-value               |
| <i>OA Incidence only</i>                                                         |         |                           |      |           |      |           |                       |
| <i>Non-users</i>                                                                 | 11,936  | 405 (3.4%)                | 1    | -         | 1    | -         | -                     |
| Users                                                                            | 792     | 67 (8.5%)                 | 2.63 | 2.01-3.44 | 2.47 | 1.86-3.27 | > 0.001               |
| <i>OA progression only</i>                                                       |         |                           |      |           |      |           |                       |
| <i>Non-users</i>                                                                 | 12,189  | 101 (0.8%)                | 1    | -         | 1    | -         | -                     |
| Users                                                                            | 796     | 26 (3.3%)                 | 4.20 | 2.73-6.47 | 2.19 | 1.11-4.29 | 2.3*10 <sup>-02</sup> |

Association of acenocoumarol usage on Incidence or progression of Osteoarthritis(OA) in RSI and RSII. Model used is a GEE (Generalized Estimated Equations) multivariate logistic regression model including acenocoumarol use.

Adjusted (Adj.) model is adjusted for age, sex, BMI, smoking, time between baseline and follow-up visit, baseline OA severity in Kellgren-Lawrence score, joint modeled, femoral neck BMD, HDL/total cholesterol ratio, physical activity, education level, hypertension, diabetes mellites and Rotterdam Study Cohort.

OR: odds ratio, CI: confidence interval, Progression: number of joints showing OA progression (from KLG=2, to higher grades or joint replacement), Incidence: number of incidence OA joints (baseline KLG=0 to KLG ≥2).

† Number of individual Knee and Hip Joints included in the analysis.

| Supplementary Table S5 : Association between acenocoumarol and VKORC1 haplotypes and MGP genotypes |         |                           |         |           |                       |  |
|----------------------------------------------------------------------------------------------------|---------|---------------------------|---------|-----------|-----------------------|--|
| Acenocoumarol use                                                                                  | Joints† | Incidence/<br>Progression | OR adj. | 95% CI    | P-value               |  |
| <b>High VKORC1 haplotype and MGP risk allele status</b>                                            |         |                           |         |           |                       |  |
| Non users VKORC1 AA/AB and MGP A/A                                                                 | 2,745   | 118 (4.3%)                | 1       | -         | -                     |  |
| Non users VKORC1 AA/AB and MGP T/*                                                                 | 4,515   | 160 (3.5%)                | 0.85    | 0.67-1.09 | 0.19                  |  |
| Non users VKORC1 BB and MGP A/A                                                                    | 1,780   | 87 (4.9%)                 | 1.15    | 0.86-1.54 | 0.38                  |  |
| Non users VKORC1 BB and MGP T/*                                                                    | 2,668   | 114 (4.3%)                | 1.01    | 0.78-1.33 | 0.89                  |  |
| Users VKORC1 AA/AB and MGP A/A                                                                     | 165     | 13 (7.8%)                 | 1.72    | 0.93-3.19 | 8.5x10 <sup>-02</sup> |  |
| Users VKORC1 AA/AB and MGP T/*                                                                     | 304     | 27 (8.9%)                 | 1.96    | 1.21-3.00 | 5.4x10 <sup>-03</sup> |  |
| Users VKORC1 BB and MGP A/A                                                                        | 117     | 11 (9.4%)                 | 2.35    | 1.21-4.56 | 1.1x10 <sup>-02</sup> |  |
| Users VKORC1 BB and MGP T/*                                                                        | 188     | 31 (16.5%)                | 4.18    | 2.69-6.50 | 1.8x10 <sup>-10</sup> |  |

Overall progression of Osteoarthritis(OA) in RSI and RSII within the follow-up time associated with acenocoumarol use effect MGP rs1800801 OA risk variant and VKORC1 expression/VKA dosage haplotypes. Model used is a GEE (Generalized Estimated Equations) multivariate logistic regression model including acenocoumarol use and adjusted for age, sex, BMI, smoking, time between baseline and follow-up visit, baseline OA severity in Kellgren-Lawrence score, joint modeled, femoral neck BMD, HDL/total cholesterol ratio, physical activity, education level, hypertension, diabetes mellites and Rotterdam Study Cohort. VKORC1 haplotype groups are based on the H haplotypes, see Supplementary Table S1. For MGP risk variants and carriers see Table 1. OR: odds ratio, CI: confidence interval, Progression: number of joints showing overall OA progression, T/\*: MGP osteoarthritis risk variant carrier (T/A) or (T/T)

† Number of individual Knee and Hip Joints included in the analysis.
